# Supplementary material for: In Silico Studies, Synthesis and Biological Evaluation of 4,5-Dehydrospisulosine Butyrate Ceramides as Potential Sphingosine Kinase I Inhibitors
Source: Research Square preprint supplement (doi:10.21203/rs.3.rs-552974/v1), 2021-05-28
Supplement: Supplementary file 1 [file 865eb7bfa78a400654cf63d2.docx]

**Supporting Materials**

*In silico* studies, synthesis and biological evaluation of 4,5-dehydrospisulosine butyrate ceramides as potential Sphingosine Kinase I Inhibitors

Parleen Kaura, Sonia Sharmab, Vinay Randhawac, Navneet Agnihotric, Ramandeep Kaurc, Vasundhara Singh*a

*aDepartment of Applied Sciences, Punjab Engineering College (Deemed to be University), Chandigarh 160 012, India*

*bDepartment cum National Centre for Human Genomics studies and Research, cDepartment of Biochemistry, Panjab University, Chandigarh 160014, India*.

| S.No. | Title | Figure/Table No. |
| --- | --- | --- |
| 1. | Data of compound 4 (1H, 13C and MS) | Figure S (1-3) |
| 2. | Data of compound 12 (1H, 13C) | Figure S (4-5) |
| 3. | Data of compound 2(1H, 13C and MS) | Figure S (6-8) |
| 4. | Data of compound 1 (1H, 13C and MS) | Figure S (9-11) |
| 5. | Data of compound 5 (1H, 13C and MS) | Figure S (12-14) |
| 6. | Data of compound 5 (1H, 13C and MS) | Figure S (15-16) |

Fig. S1: 1H NMR- Compound **4**

a

a

a

OH/NH/CH2

b

c

d

e

f

g

Fig. S2: 13C NMR- Compound **4**

a

b

c

d

e

f

g

h

Fig. S3: LCMS - Compound **4**

**SAIF/CIL,PANJAB UNIVERSITY,CHANDIGARH**

**WATERS,Q-TOF MICROMASS (ESI-MS)**

m/z

60

80

100

120

140

160

180

200

220

240

260

280

300

320

340

360

380

400

420

440

460

480

500

%

0

100

PARLEEN PK-CER-01 7 (0.153) Cm (6:19-25:76)

TOF MS ES+

1.91e4

322.5281

19068

362.4865

16066

340.5348

15110

363.3854

6730

363.5153

3417

434.4909

902

364.5084

858

[M+H]+

[M+Na]+

[M-OH]+

Fig. S4: 1H NMR Compound **12**

a

a

a

CH2

OH

NH

b

c

d

e

Fig. S5: 13C NMR Compound **12**


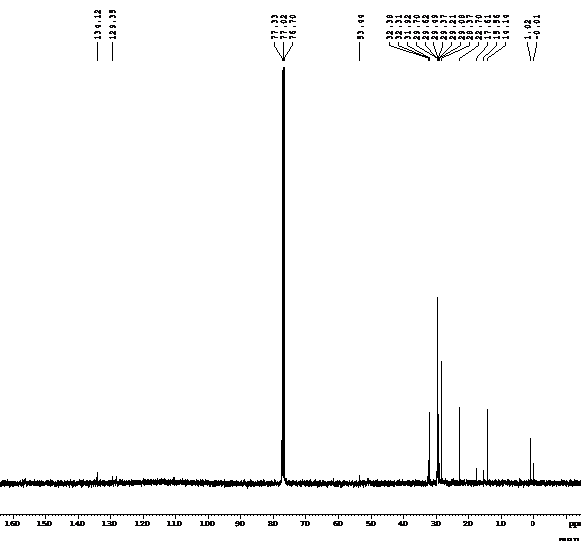


a

a

b

c

d

e

Fig. S5: 1H NMR Compound **2**

CH2

e

d

c

b/NH2

a

a

Fig. S1: 13C NMR Compound **2**

a

a

b

c

CdCl3

d

e

Fig. S8: LCMS- Compound **2**

[M+1]+
+1

[M-OH]+

Fig. S9: 1H NMR Compound **1**

CH2

a

a

b/NH2

c

d

e

Fig. S10: 13C NMR Compound **1**

a

a

c/d

d/e

Fig. S11: LCMS- Compound **1**

[M+H]+

[M-OH]+

Fig. S12: 1H NMR Compound **5**

a

a

a

OH/NH

c

b

d

e

f

g

Fig. S13: 13C NMR Compound **5**

a

b

CdCl3

c

a

h

d

e

g

f

Fig. S14: LCMS- Compound **5**

[M+1]+

[M+Na]+

[M-OH]+

Fig. S15: 1H NMR- Compound **6**

Fig. S16: LCMS- Compound **6**

[M+NH3]+

[M+H]+
